# Supplementary material
Source: PubMed Central journal article supplement (PMC6054811)

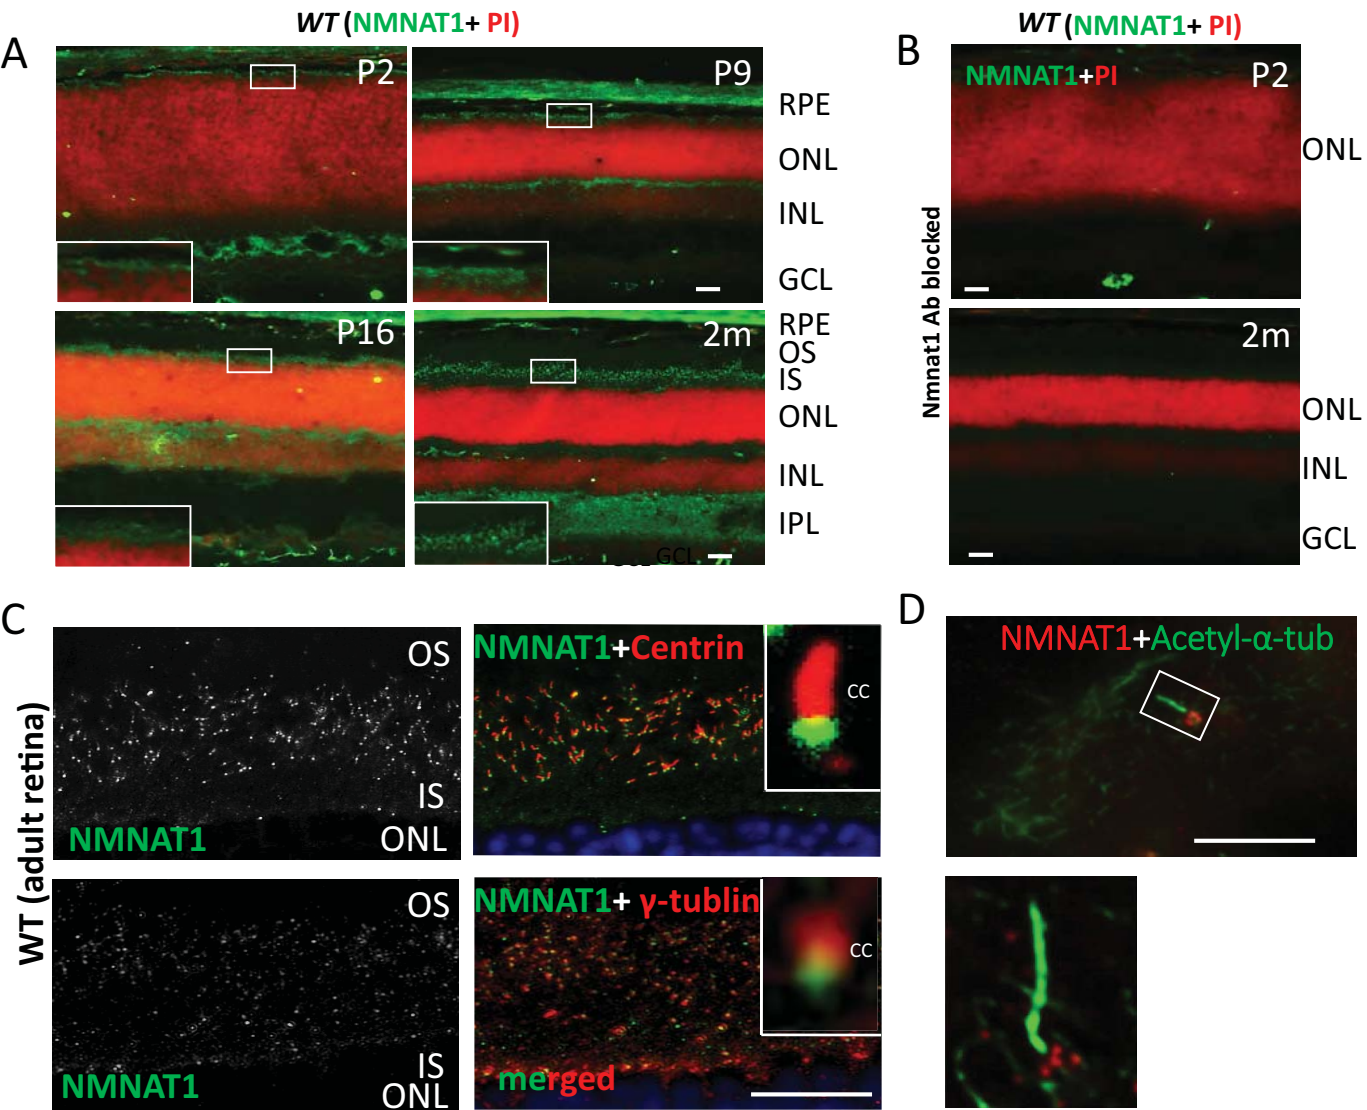

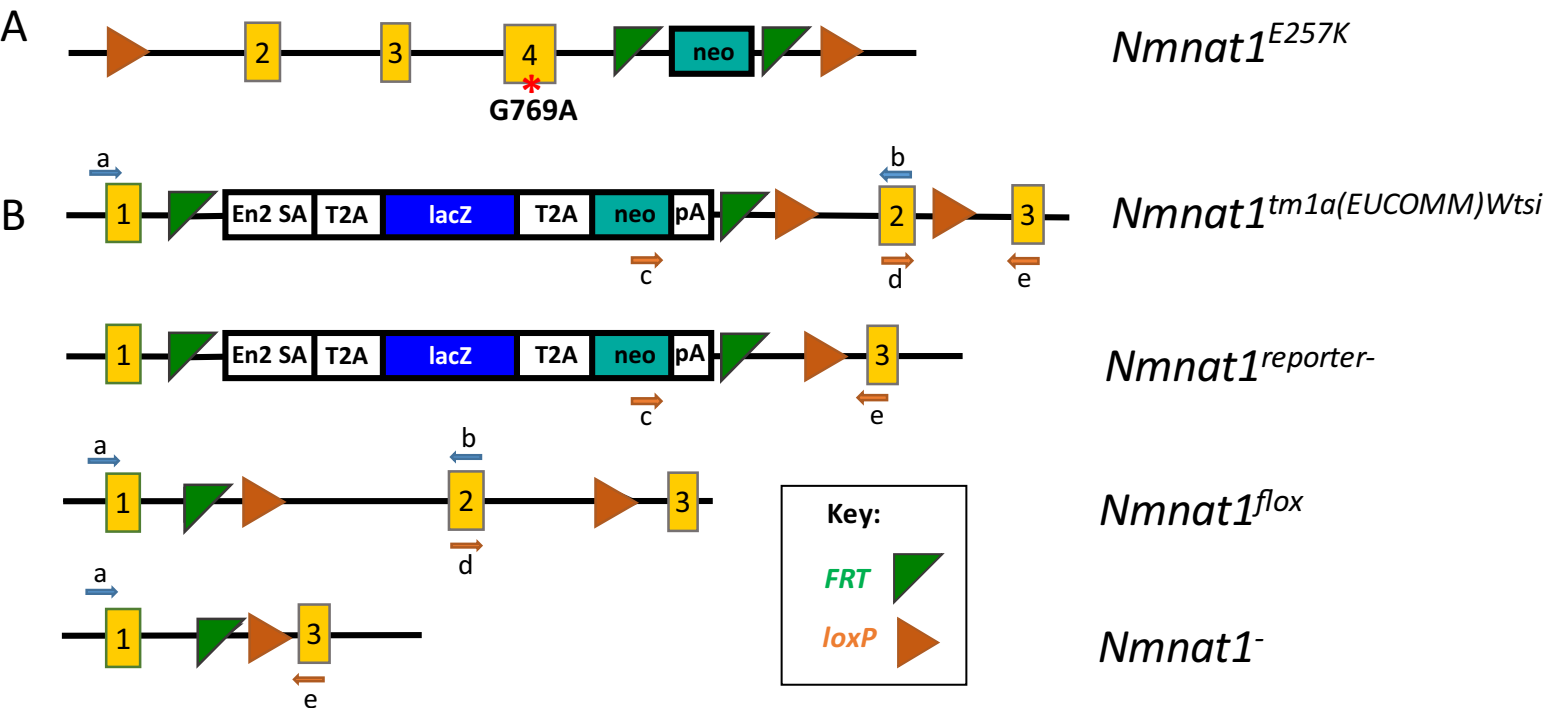

C

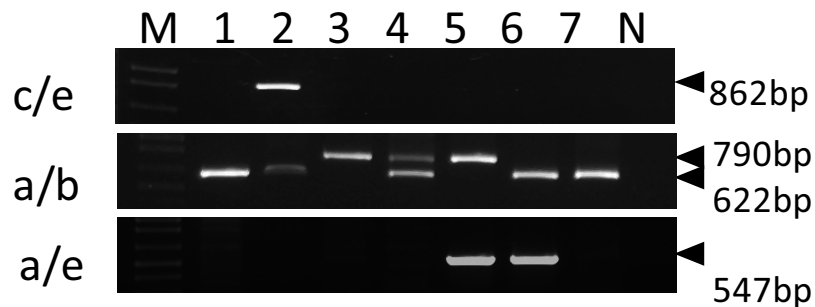

M: 1kb plus DNA ladder  
 1: *Nmnat1*<sup>tm1a(EUCOMM)Wtsi/+</sup>  
 2: *Nmnat1*<sup>reporter-/+</sup>  
 3: *Nmnat1*<sup>flox/flox</sup>  
 4: *Nmnat1*<sup>flox/+</sup>  
 5: *Nmnat1*<sup>flox/-</sup>  
 6: *Nmnat1*<sup>+/-</sup>  
 7: *Nmnat1*<sup>+/+</sup>  
 N: non-template control

A

1 mo.

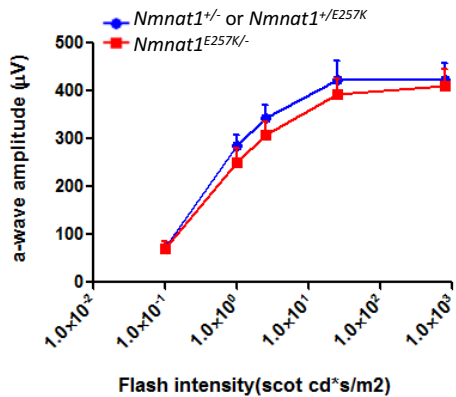

5 mo.

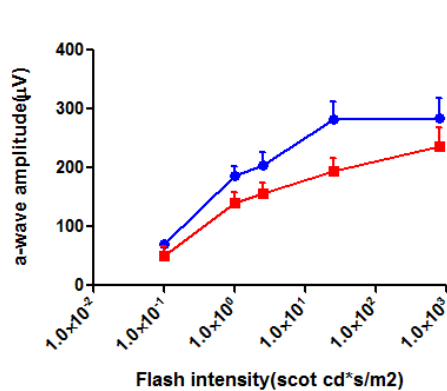

12 mo.

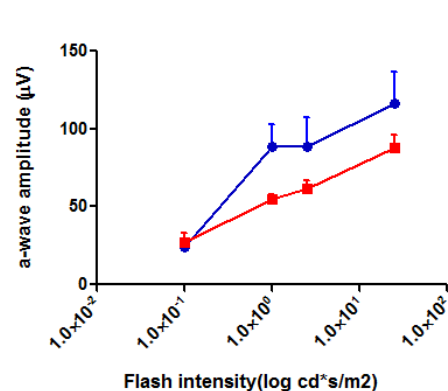

B

1 mo.

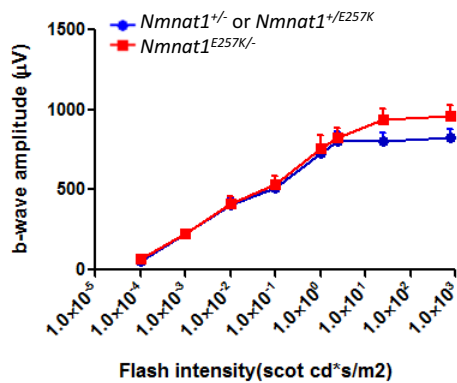

5 mo.

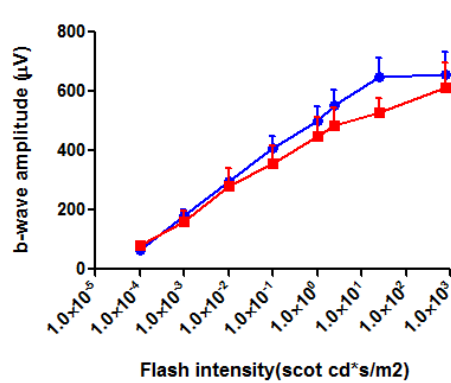

12 mo.

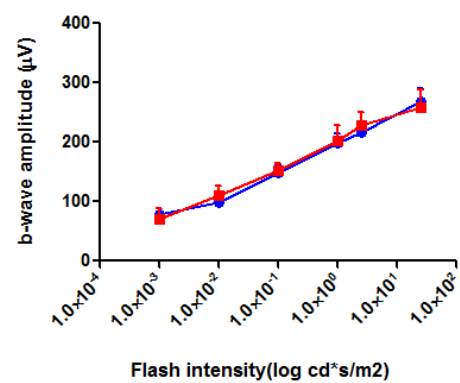

A

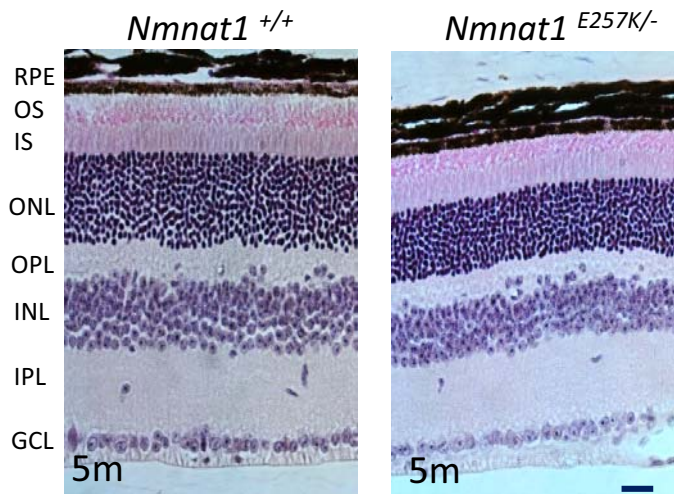

B

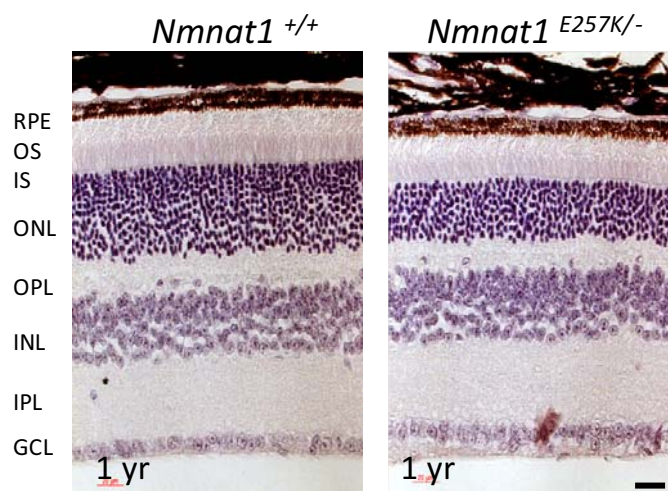

C

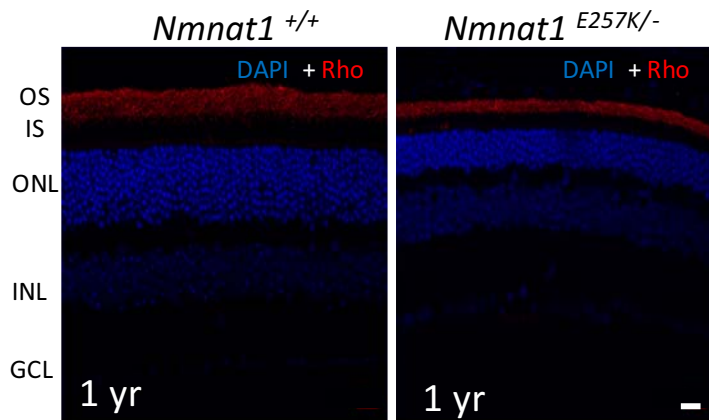

D

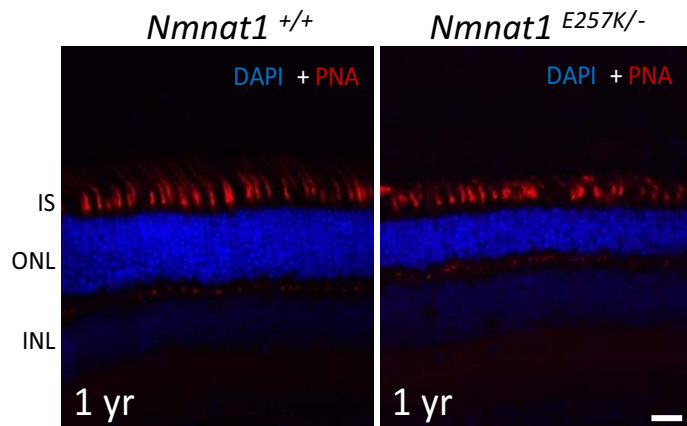

A

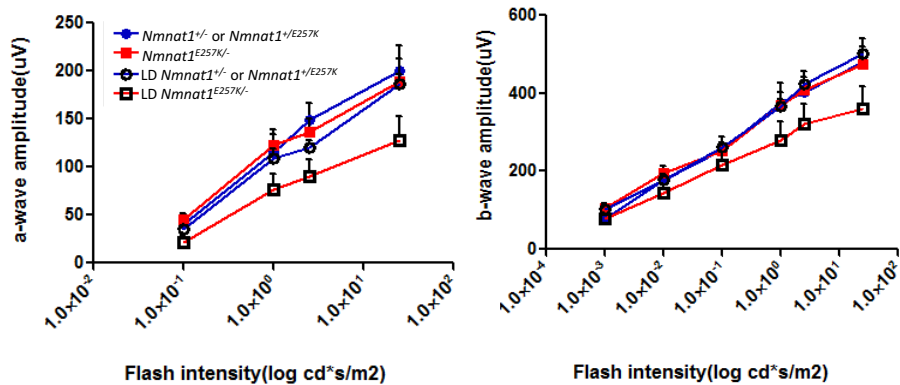

B

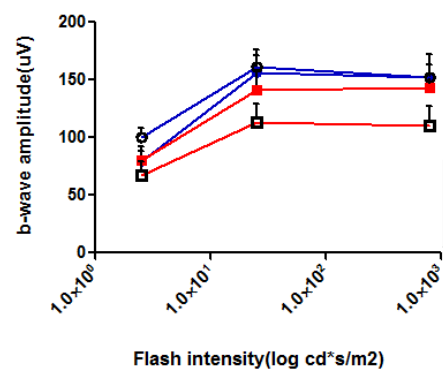

C

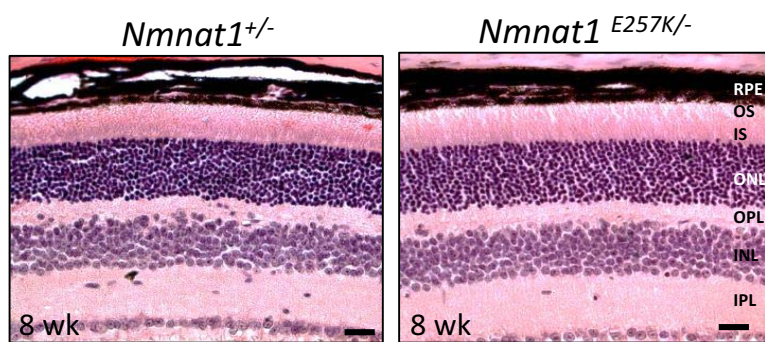

before Light damage

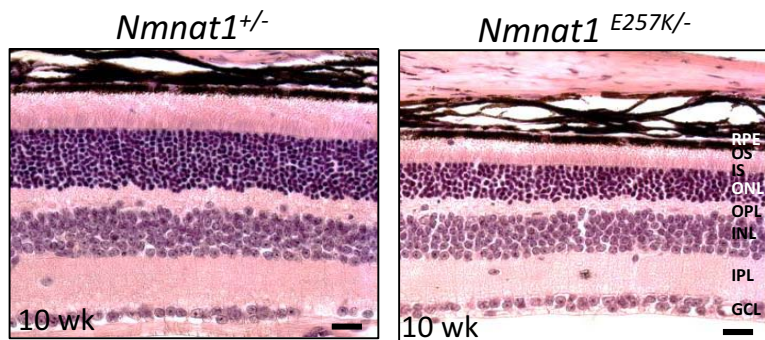

after Light damage

D

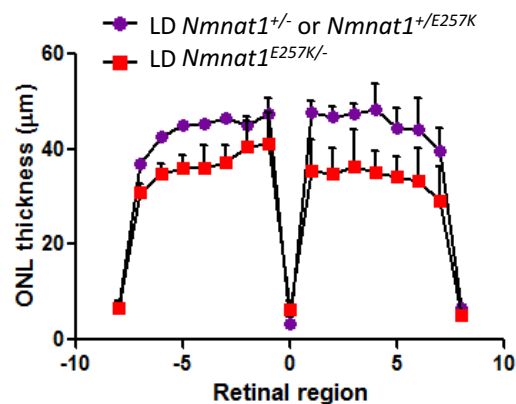



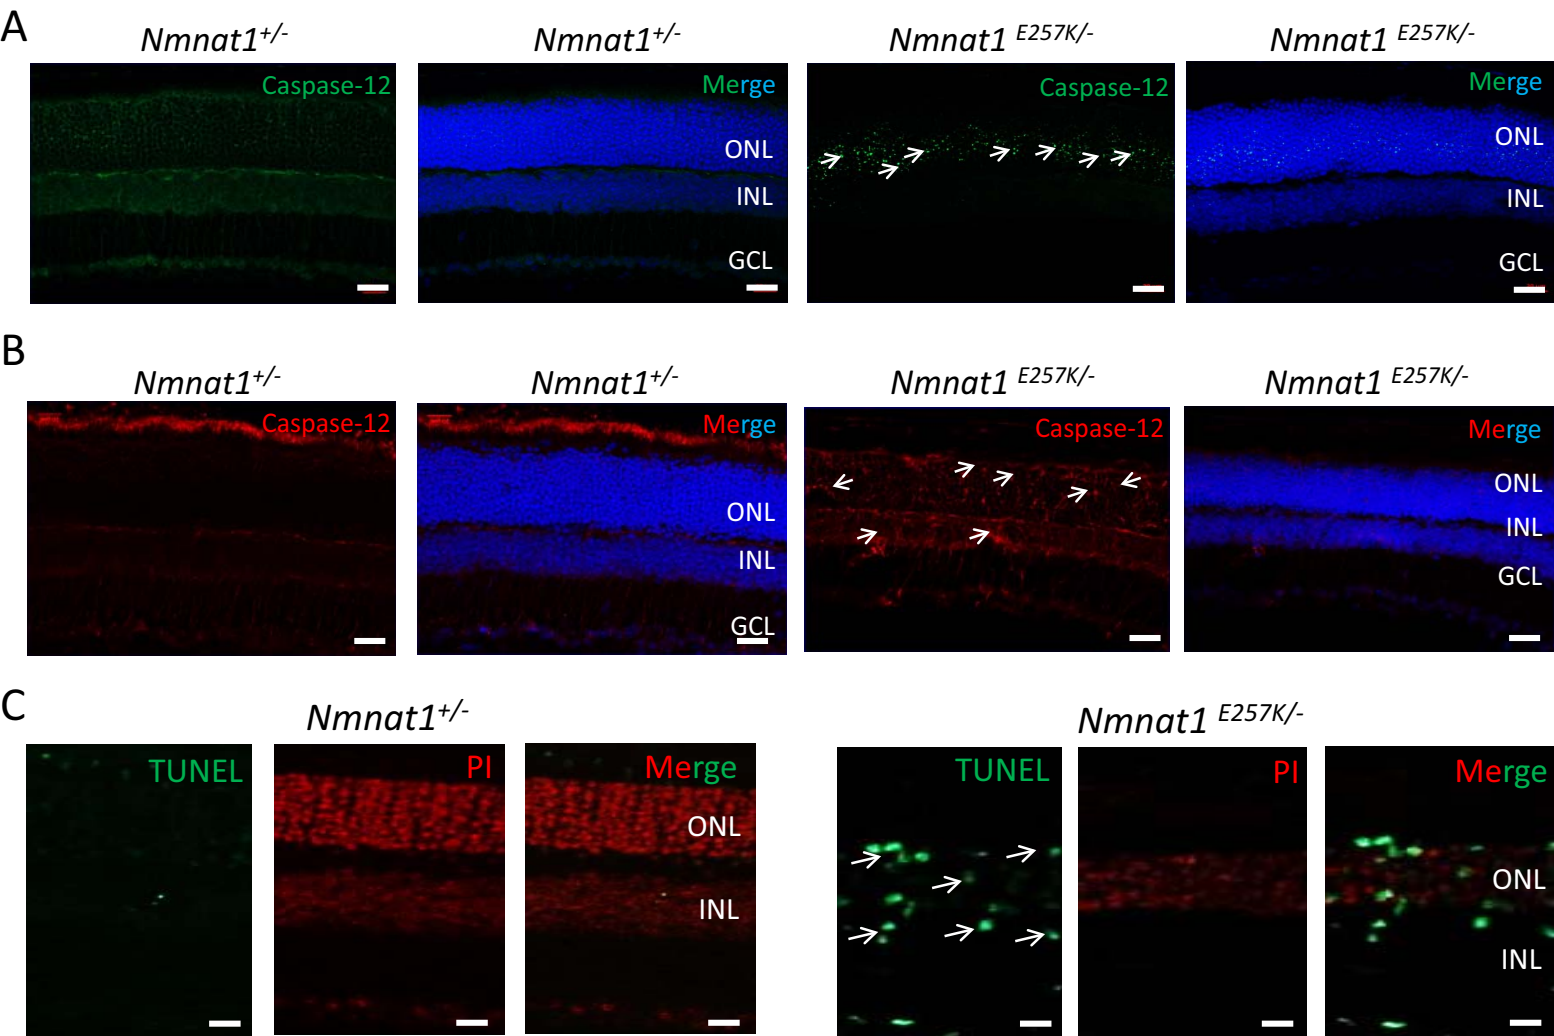

A

*Nmnat1<sup>flox/+</sup>**Nmnat1<sup>flox/-</sup>;Chx10-Cre<sup>+/-</sup>*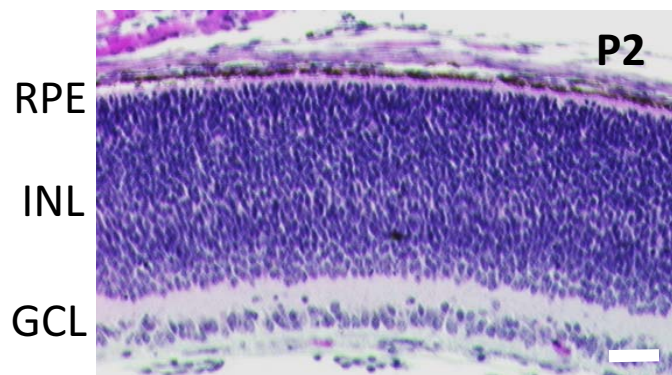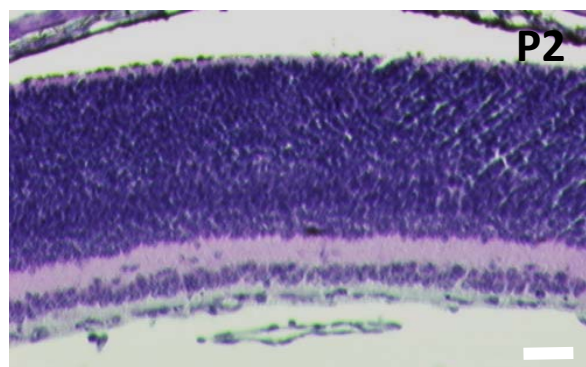

B

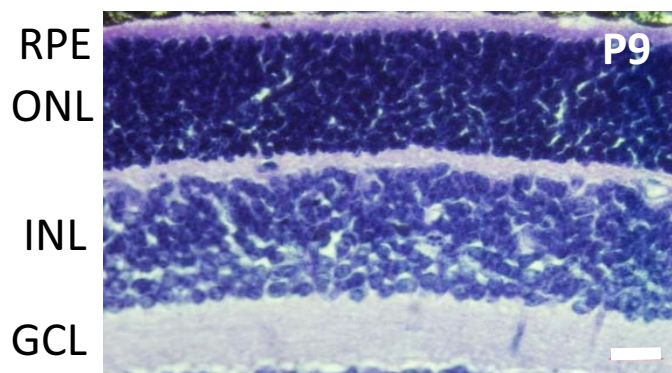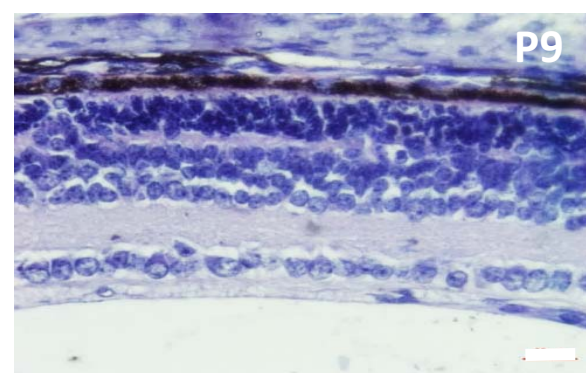

C

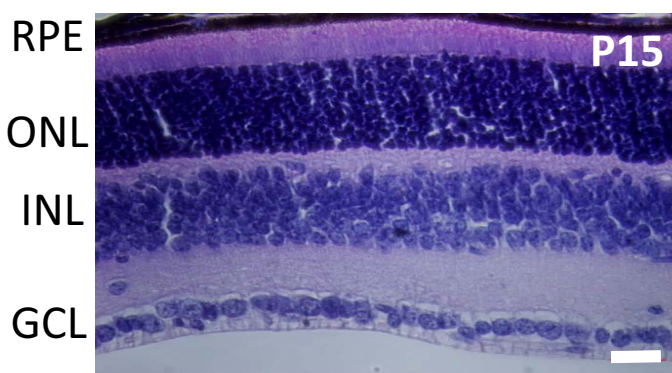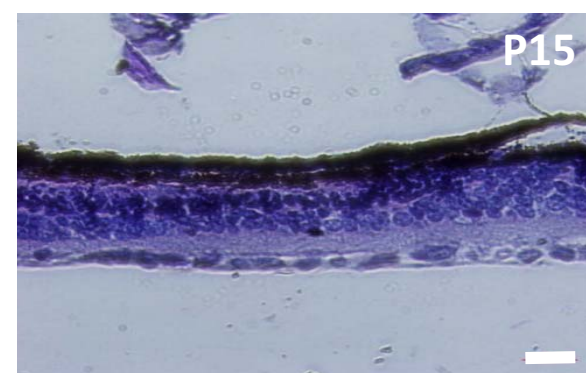

A

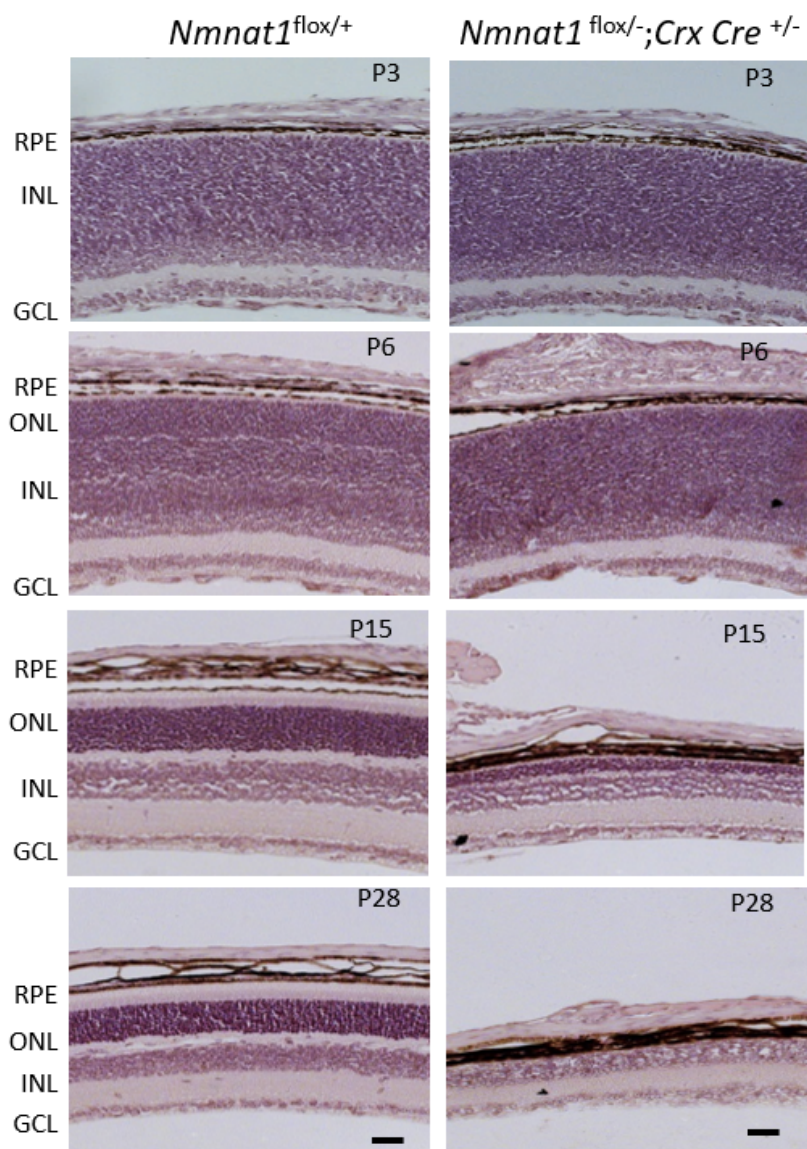

B

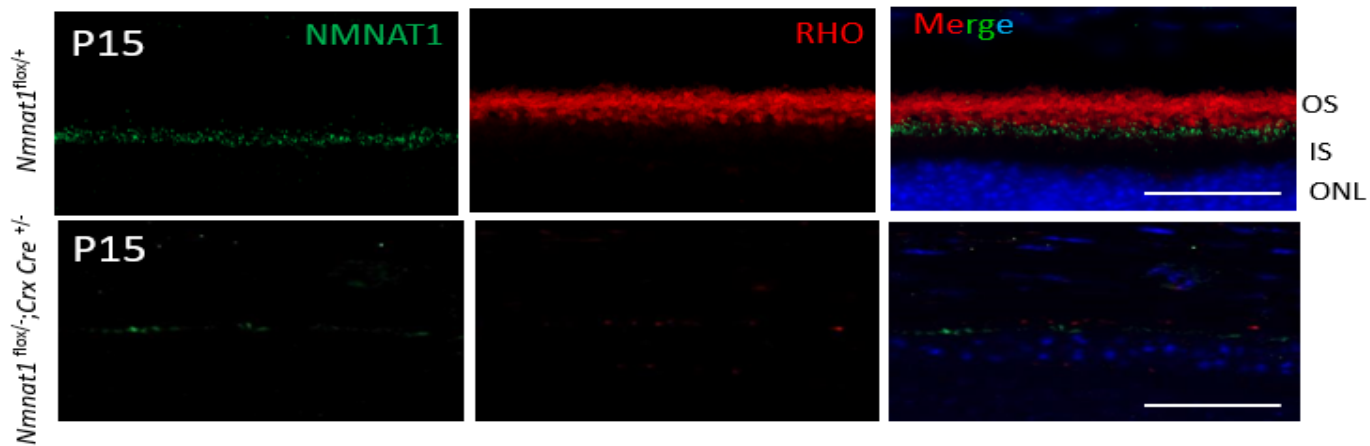



A

*Nmnat1*<sup>+/+</sup>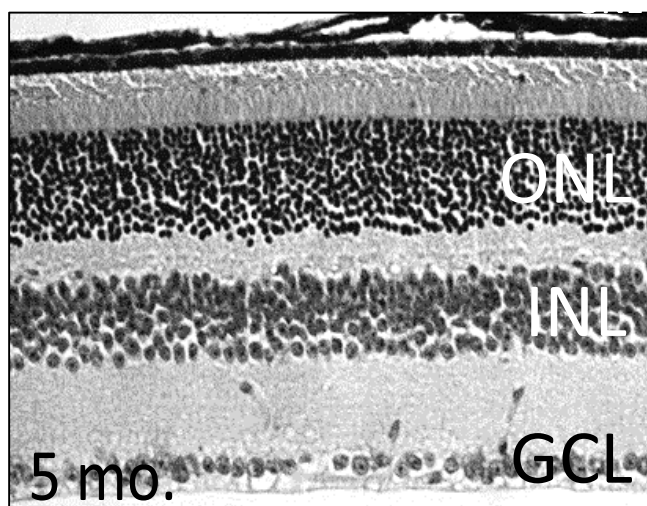*Nmnat1*<sup>E257K/E257K</sup>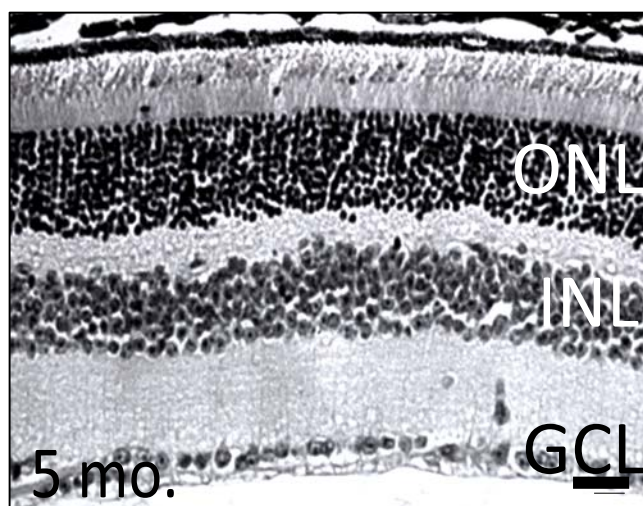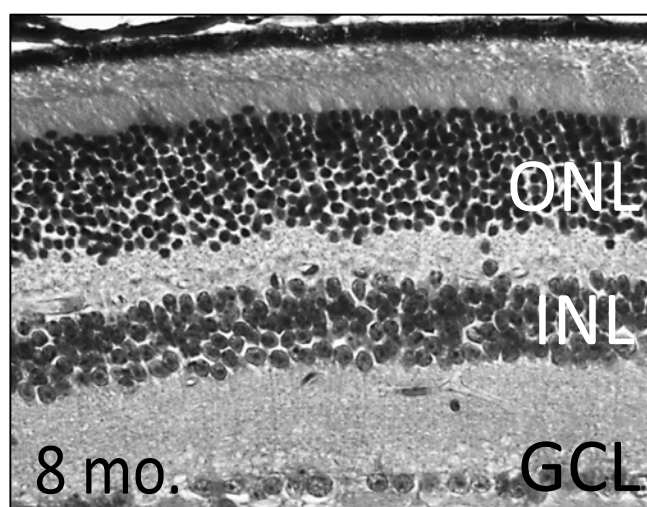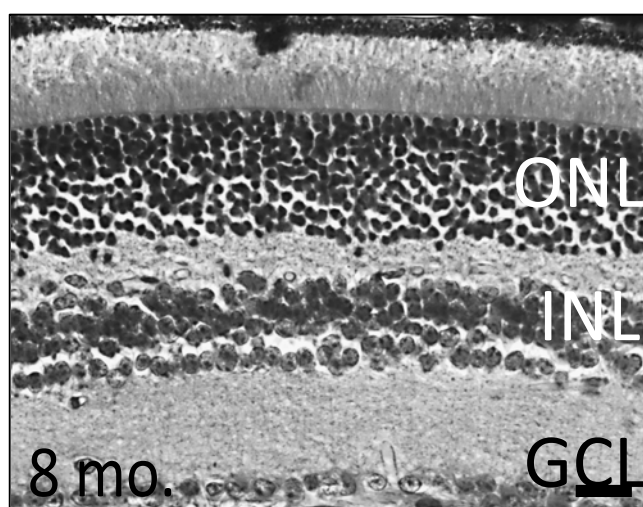

B

*Nmnat1*<sup>E257K/E257K</sup>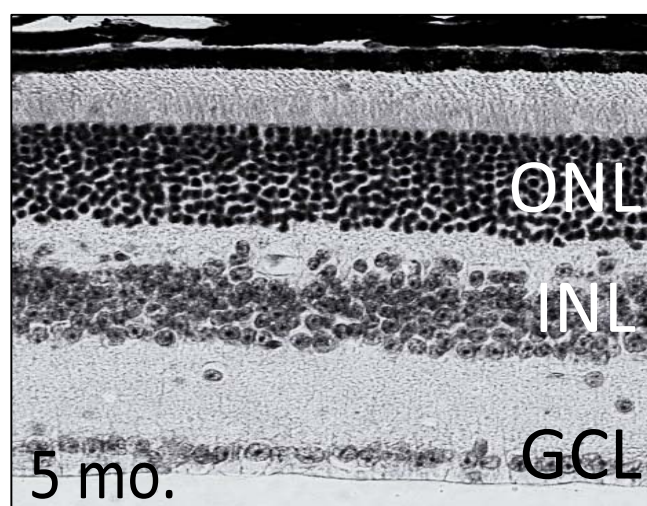

Before LD

*Nmnat1*<sup>E257K/E257K</sup>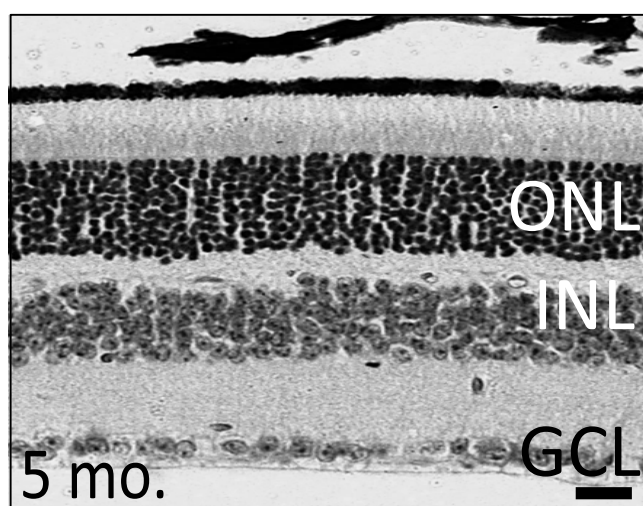

After LD

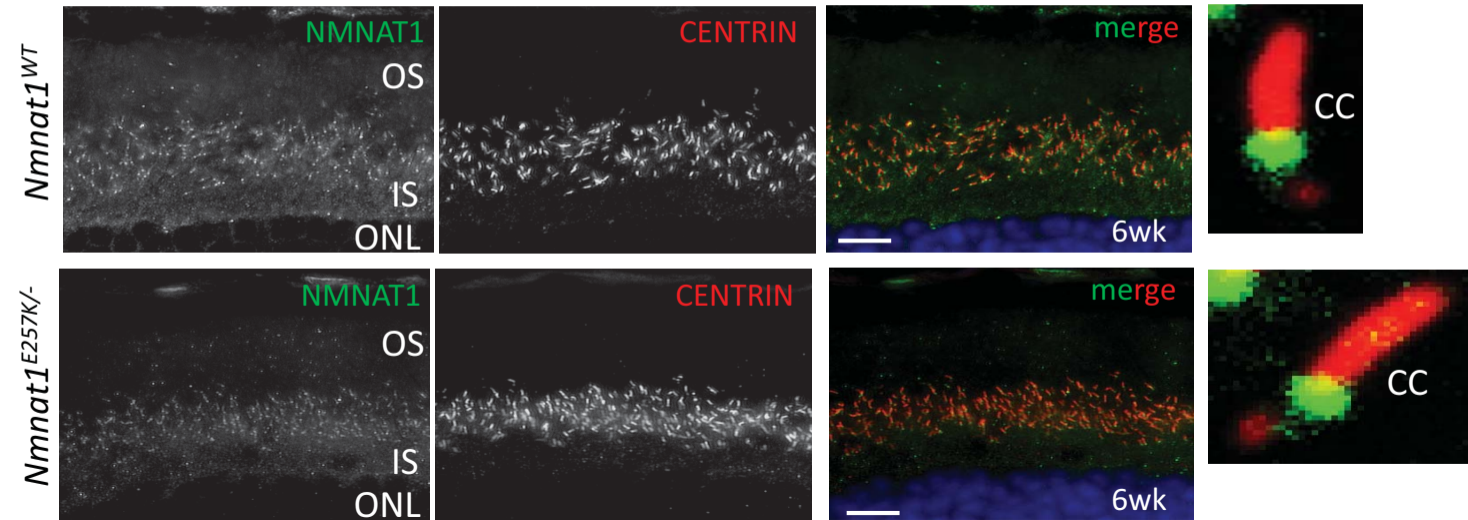



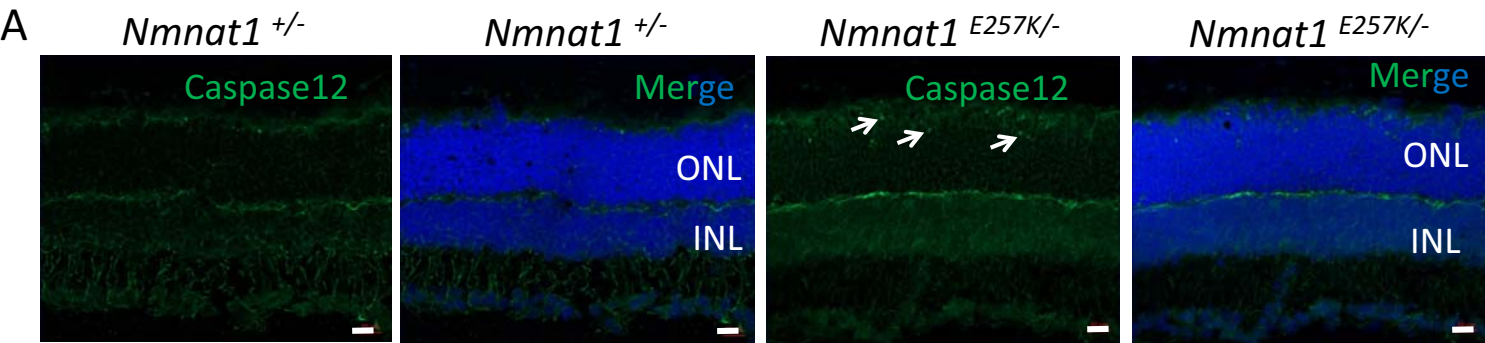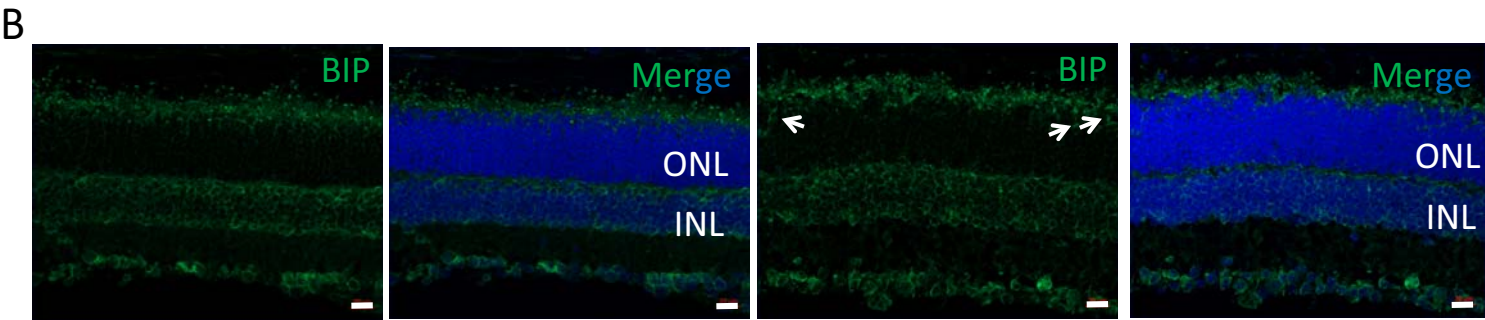

A

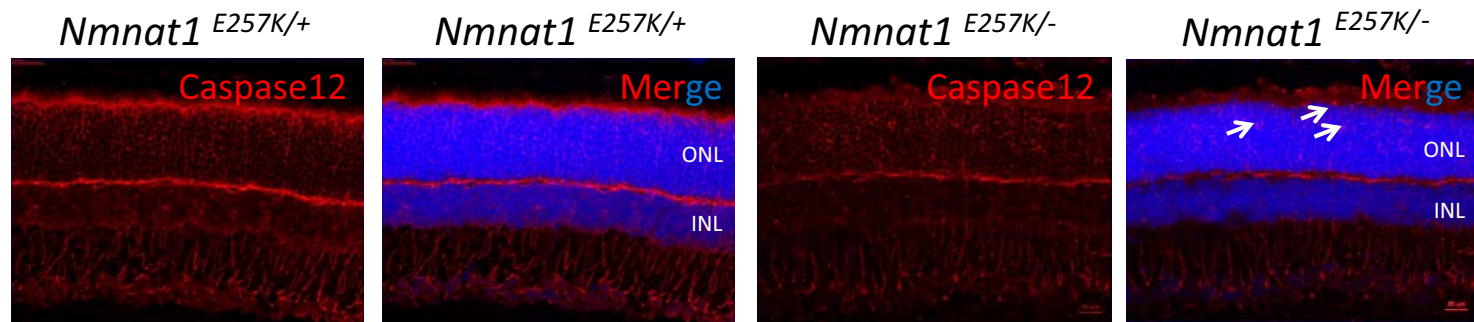

B

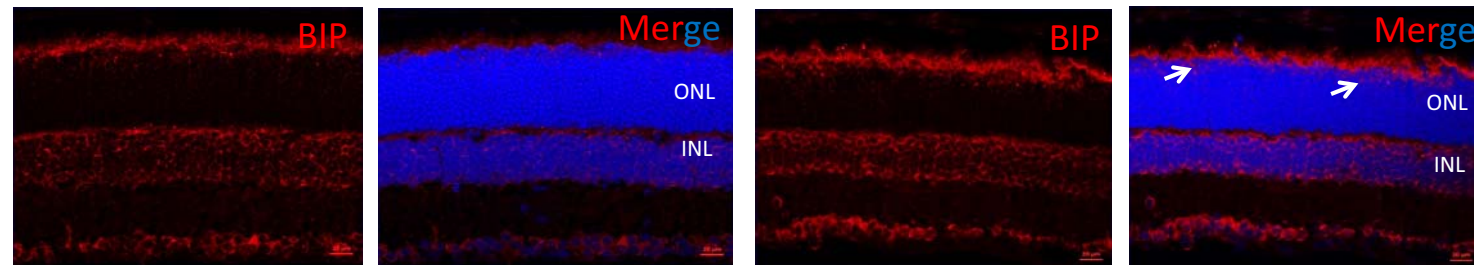

C

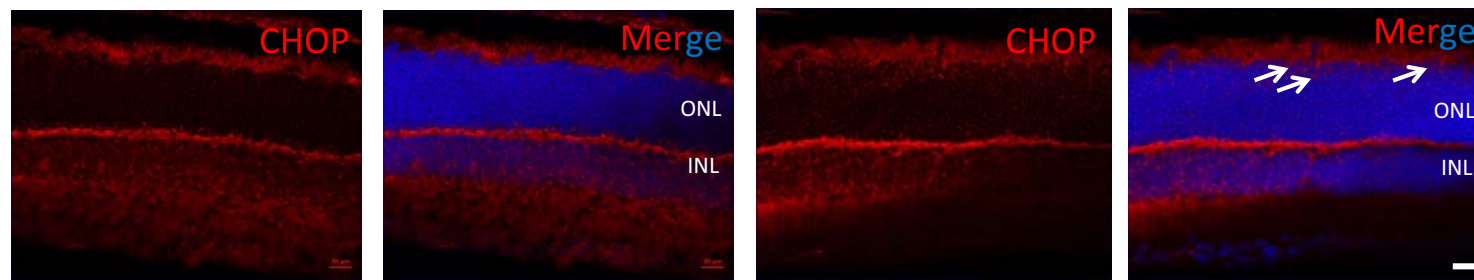



A

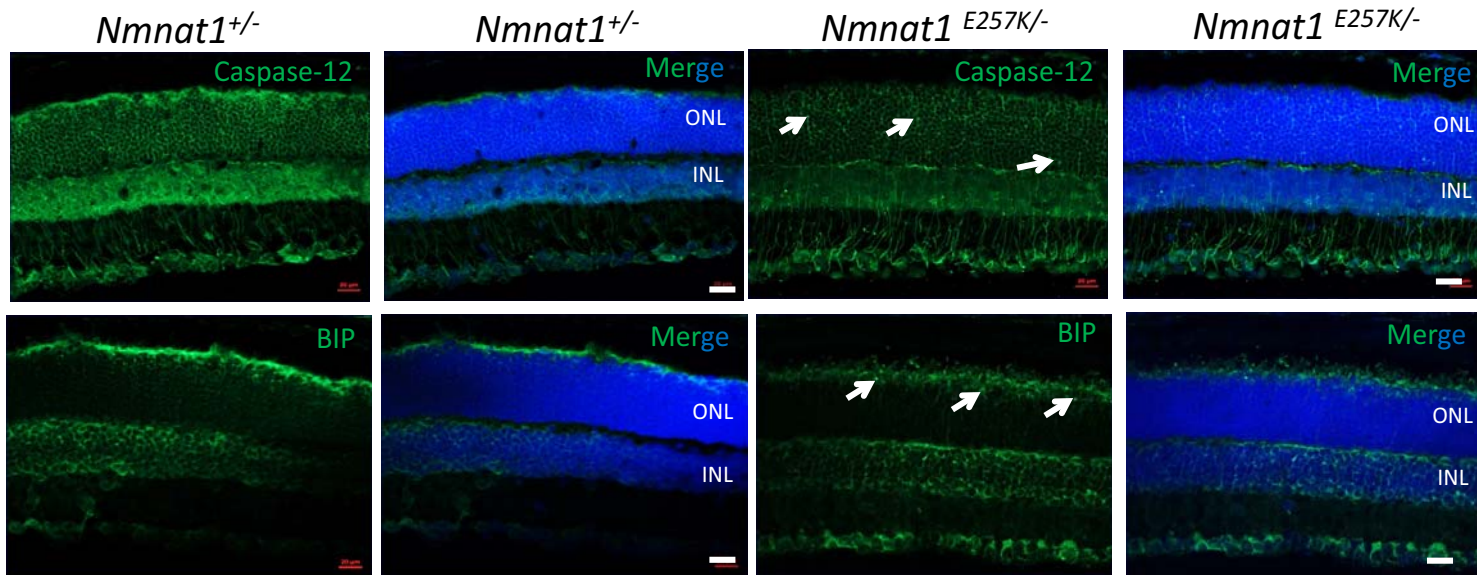

B

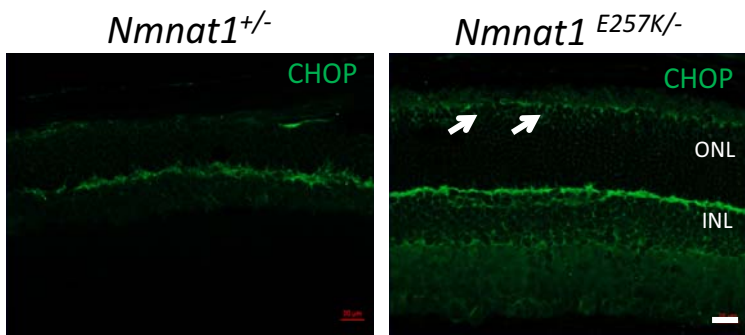

A

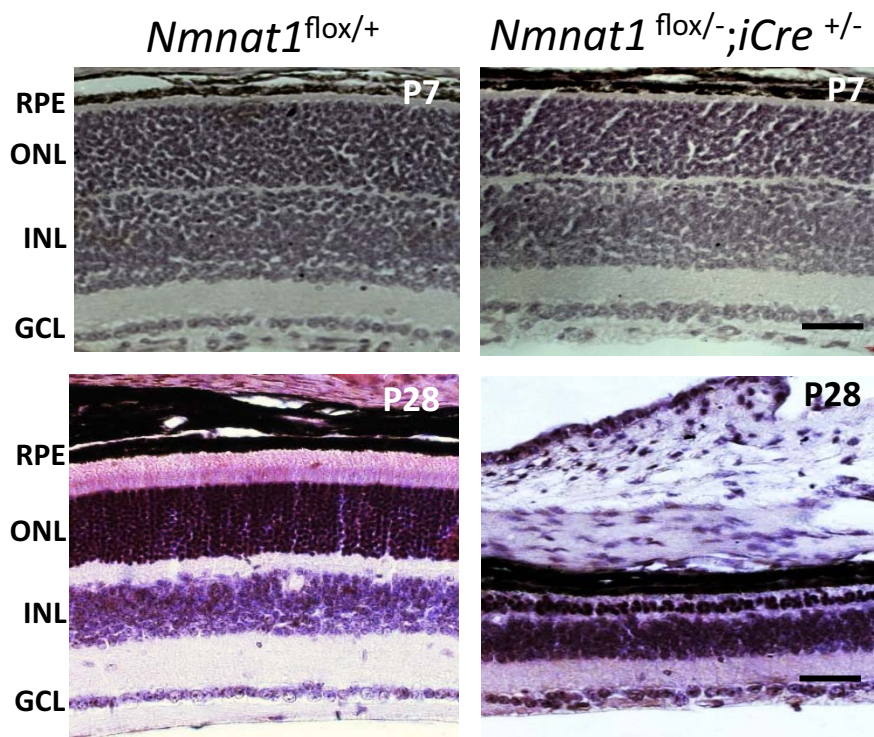

B

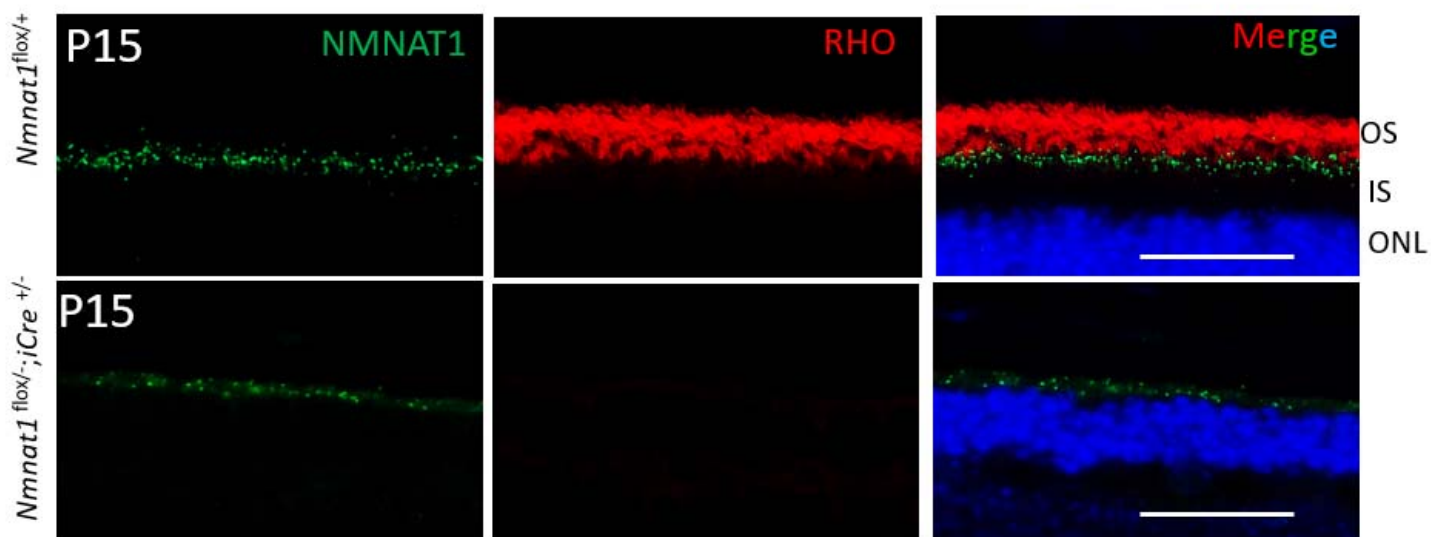

Supplement: NIHMS963542-supplement-1.pdf [file NIHMS963542-supplement-1.pdf]
